# Supplementary material
Source: publisher figshare collection journal article supplement (https://karger.figshare.com/ndownloader/files/24100925)
Supplement: Supplementary file 1 [file 24100925]

**Supplemental Table 3. DBP of LCZ696 and ARB**

| **Study** | **LCZ696** | **LCZ696** | | **ARB** | **ARB** | |
| --- | --- | --- | --- | --- | --- | --- |
| **baseline** | **final** | **baseline** | **final** |
| **Ruilope LM [6]**  **(NCT00549770)** | 100 mg  200 mg  400 mg | 99.9±3.6  99.9±4.1  100.4±4.1 | 79.8±5.7  77.0±6.0  76.8±5.5 | Valsartan 80mg  Valsartan 160mg  Valsartan 320mg | 99.5±4.1  99.8±4.4  99.5±3.6 | 80.4±5.2  80.3±7.1  78.6±4.5 |
| **Kario K [7]**  **(NCT01193101)** | 100 mg  200 mg  400 mg | 99.9±3.8  100.1±4.1  99.9±4.2 | 78.4±4.5  79.0±5.2  67.5±5.0 | — | — | — |
| **RATIO [8]**  **(NCT01281306)** | 400 mg | 90.9±8.9 | 71.3±8.5 | Valsartan 320mg | 90.2±9.4 | 72.9±9.0 |
| **Supasyndh O [9]**  **(NCT01615198)** | 100mg  200mg | 84.6±9.7  84.6±9.7 | 68.4±9.5  66.0±10.1 | Olmesartan 10mg  Olmesartan 20mg | 85.2±9.8  85.2±9.8 | 71.0±10.8  68.0±10.2 |
| **PARAMETER [10]**  **(NCT01692301)** | 200 mg | 87.8±9.7 | 68.2±8.6 | Olmesartan 20mg | 89.9±10.4 | 74.5±9.2 |
| **Schmieder RE [14]**  **(NCT01870739)** | 400 mg | 92.7±8.8 | 79.1±7.8 | Olmesartan 20mg | 91.7±8.7 | 79.9±9.2 |
| **Wang TD [16]**  **(NCT01681576)** | 400 mg | 90.2±6.9 | 73.0±7.1 | Valsartan 320mg | 90.4±7.2 | 75.0±8.0 |
| **NCT01599104 [11]** | 200 mg  400 mg | — | — | Olmesartan 20 mg | — | — |
| **NCT01785472 [12]** | 200 mg  400 mg | — | — | Olmesartan 20mg | — | — |
| **NCT01876368 [13]** | 200 mg | — | — | Olmesartan 20mg | — | — |
| **NCT01353508 [15]** | 400 mg | — | — | Valsartan 160mg | — | — |
| **NCT01256411 [17]** | 200 mg  400 mg | — | — | — | — | — |

- **: no report; ARB: angiotensin receptor blockers**
